1 **Determining the replication kinetics and cellular tropism of the ruminant-**  
2 **associated Influenza D virus on primary human airway epithelial cells.**

3  
4 **Running title:** The zoonotic potential of Influenza D virus

5  
6 Melle Holwerda<sup>1,2,3</sup>, Laura Laloli<sup>1,2,3,#</sup>, Isabel Stürmer<sup>1,2,3,#</sup>, Jasmine Portmann<sup>1,2</sup>, Hanspeter  
7 Stalder<sup>1,2</sup> and Ronald Dijkman<sup>1,2,\*</sup>

8  
9 <sup>1</sup> Institute of Virology and Immunology, Bern & Mittelhäusern, Switzerland.

10 <sup>2</sup> Department of Infectious diseases and Pathobiology, Vetsuisse Faculty, University of Bern,  
11 Bern, Switzerland.

12 <sup>3</sup> Graduate School for Cellular and Biomedical Sciences, University of Bern, Switzerland.

13 # These authors contributed equally to this article.  
14

15  
16  
17  
18  
19  
20  
21  
22  
23  
24  
25  
26  
27  
28  
29 \*Correspondence: Ronald Dijkman, Institute of Virology and Immunology, Department of  
30 infectious Diseases and Pathobiology, Vetsuisse Faculty, University of Bern, Länggassstrasse  
31 122, 3012 Bern, Switzerland. Tel: +41 31 631 2259, Email:  
32 ronald.dijkman@vetsuisse.unibe.ch.

33 **One-sentence summary of the conclusion**

34 We show that the ruminant-associated Influenza D virus has direct transmission capability to

35 humans.

36

37 **Abstract**

38 Influenza viruses are notorious pathogens that frequently cross the species barrier with often  
39 severe consequences for both animal and human health. In 2011, a novel member of the  
40 *Orthomyxoviridae* family, Influenza D virus (IDV), was identified in the respiratory tract of  
41 diseased swine. Epidemiological surveys revealed that IDV is distributed worldwide among  
42 livestock and that IDV-directed antibodies are detected in humans with occupational exposure  
43 to livestock. To identify the transmission capability of IDV to humans, we determined the  
44 viral replication kinetics and cell tropism using an *in vitro* respiratory epithelium model of  
45 humans. The inoculation of IDV revealed efficient replication kinetics and apical progeny  
46 virus release at different body temperatures. Intriguingly, the replication characteristics of  
47 IDV revealed many similarities to the human-associated Influenza C virus, including the cell  
48 tropism preference for ciliated cells. Collectively, these results might indicate why IDV-  
49 directed antibodies are detected among humans with occupational exposure to livestock.  
50

51 **Introduction**

52 After the initial discovery of Influenza D virus (IDV) in 2011, among swine with Influenza-  
53 like symptoms, knowledge about this new genus in the family of *Orthomyxoviridae* is  
54 increasing (1, 2). Epidemiological studies have shown that the virus has a worldwide  
55 distribution, whereby at least two distinct genetic lineages are cocirculating and reassorting  
56 (3–10). Because of the high seroprevalence, cattle is the proposed natural reservoir of IDV, in  
57 which IDV causes mild respiratory disease symptoms (11). In addition to cattle, IDV-specific  
58 antibodies have been detected in swine, feral swine, equine, ovine, caprine and camelid  
59 species, suggesting a broad host tropism for IDV (3, 4, 9, 12, 13). However, the most striking  
60 observation is the detection of IDV-directed antibodies among humans with occupational  
61 exposure to livestock (14).

62         There are several indicators that IDV has a zoonotic potential. For instance, the  
63 utilization of the 9-*O*-acetyl-*N*-acetylneuraminic acid as a receptor determinant, that allows  
64 the hemagglutinin esterase fusion (HEF) glycoprotein of IDV to bind the luminal surface of the  
65 human respiratory epithelium (1). Interestingly, the utilization of this receptor is also  
66 described for the closely related, human associated Influenza C virus (ICV) (15, 16).  
67 Furthermore, the detection of IDV-directed antibodies among humans with occupational  
68 exposure to livestock and the molecular detection of IDV in a nasopharyngeal wash of a field  
69 worker with close contact to livestock indicates that cross species transmission occurs (14,  
70 17). However, thus far, there is no indication of wide spread prevalence among the general  
71 population although the virus has been detected during molecular surveillance of aerosols  
72 collected at an international airport (18, 19). Therefore, it remains unclear whether IDV can  
73 indeed infect cells within the human respiratory tract and thus whether it has a zoonotic  
74 potential.

75         The respiratory epithelium is the main entry port for respiratory pathogens and is  
76 therefore an important first barrier for intruding viruses. For more than 15 years, the human

77 well-differentiated airway epithelial cell (hAECs) culture model has been applied as an *in*  
78 *vitro* surrogate model of the *in vivo* respiratory epithelium to investigate a wide range of  
79 emerging and zoonotic respiratory viruses on their capability of direct transmission to humans  
80 (20–24). The aim of this study is to investigate the transmission capability of IDV to humans  
81 by inoculating hAEC cultures with the ruminant-associated IDV. In addition, we sequentially  
82 passaged IDV further on naïve hAEC to determine whether infectious progeny virus is  
83 produced. This revealed that IDV is able to efficiently replicate in hAEC cultures and can be  
84 subsequently passaged. Moreover, due to the similarity of IDV with the human associated  
85 IDV, we compared their viral kinetics and cell tropism. This showed that both viruses have  
86 similar replication kinetics and share a cell tropism preference towards ciliated cells. These  
87 results emphasize that there is no fundamental restriction of IDV replication within the human  
88 respiratory epithelium. Therefore, these findings might explain why IDV-specific antibodies  
89 can be detected in humans with occupational exposure to livestock.

90 **Results**

91 As a first step to address the transmission capability of IDV to humans we inoculated  
92 the prototypic D/Bovine/Oklahoma/660/2013 strain on hAECs of three biological donors.  
93 Viral progeny release was monitored by collecting washes with 24-hour intervals for a  
94 duration of 72 hours. To analyse temperature dependent effects, incubation of the cultures was  
95 performed at temperatures that correspond with those of the human upper and lower  
96 respiratory tract, 33°C and 37°C respectively. The release of viral progeny from the apical  
97 washes was analysed by quantitative real-time reverse transcription PCR for viral transcripts  
98 and virus titration for infectious virus. The first viral transcripts were detected at 24 hours  
99 post-infection (hpi) among all donors, independently of the incubation temperature (**Figure**  
100 **1A and B**). However, some temperature dependent differences were observed when the  
101 infectivity of the progeny virus was analysed. When incubated at 33°C, viral titres were  
102 detected for every donor at 48 and 72 hpi, but only one donor show a viral titre at 24 hpi  
103 (**Figure 1C**). In contrast, we observed viral titres as early as 24 hpi for IDV infection at 37°C  
104 for every donor that increased over time (**Figure 1D**). These results indicate that IDV kinetics  
105 seems to be more efficient at ambient temperatures corresponding to the human lower  
106 respiratory tract. This, most likely, reflect the necessity for IDV to replicate at the body  
107 temperature of cattle, which is between 37 - 39°C.

108 After having demonstrated that IDV is able to replicate in hAEC cultures from  
109 different donors at both 33°C and 37°C, we wanted to corroborate these results via  
110 immunofluorescence analysis. However, commercial antibodies against IDV are currently  
111 unavailable, so we ordered a custom generated antibody directed against the nucleoprotein  
112 (NP) of the prototypic D/Bovine/Oklahoma/660/2013 strain. Microscopic analysis of IDV-  
113 infected hAEC cultures revealed clusters of NP-positive cells at both 33°C and 37°C, whereas  
114 no fluorescence signal was observed in the control hAEC cultures (**Figure 1E-H**). The  
115 majority of the fluorescence signal from the NP-positive cells has a cytoplasmic distribution

116 pattern, but some of those also appeared to have a nuclear staining pattern. These findings  
117 suggest that, like other *Orthomyxoviruses*, the NP of IDV is actively translocated to the  
118 nucleus during viral replication (25, 26). Combined, these results demonstrate that IDV is able  
119 to efficiently replicate in hAEC cultures from different donors at temperatures corresponding  
120 to both the upper and lower respiratory tract of humans.

121 To analyse if IDV progeny virus is able to infect naïve hAECs of a new donor, we  
122 sequentially passaged a 10-fold dilution of the previous obtained 72 hpi apical wash from our  
123 three donors on a naïve donor (P2). That was further subpassaged at 48 hpi upon hAEC  
124 cultures of the same donor (P3). Like before, we performed the experiment at both 33°C and  
125 37°C to assess whether there are temperature dependent effects. We monitored the production  
126 of viral progeny at 48 and 96 hpi for each of the sub-passaging experiment. In the first  
127 passage, viral RNA was detected at 48 hpi and increased with one order of magnitude at 96  
128 hpi (**Figure 1I**). However, we observed that the viral yield at 37°C was approximately one  
129 order lower in the first round compared to the viral yield at 33°C, while at 96 hpi this  
130 difference slightly reduced. Interestingly, no difference between the different incubation  
131 temperatures was observed in the second passaging experiment (**Figure 1J**). Also, no  
132 pronounced differences were observed in the viral titres between the different temperatures or  
133 passage numbers at 96 hpi (**Figure 1J**). However, at 48 hpi, we only detect infectious virus in  
134 the apical wash from the last passaging experiment that was performed at 37°C (P3; **Figure**  
135 **1J**). These results show that the viral progeny from the initial experiments on hAEC cultures  
136 is infectious and that IDV can be sequentially passaged on hAEC cultures from different  
137 donors at both 33°C and 37°C.

138 Due to the structural similarity between the HEF of IDV and ICV, and the fact that  
139 ICV is a well-known common cold virus that is able to cause a mild upper respiratory tract  
140 infection in humans, we wondered how IDV replication efficiency relates to ICV in our hAEC  
141 cultures (27, 28). To address this question, we inoculated hAEC cultures with equal amounts

142 of hemagglutination units for ICV (C/Johannesburg/1/66) and IDV and incubated the cultures  
143 at 33°C. The viral replication kinetics were monitored as before, by collecting apical washes  
144 every 24 hours for a duration of 72 hours. We observed similar replication kinetics for both  
145 viruses, although the viral RNA yield for ICV was higher compared to IDV (**Figure 2A and**  
146 **B**). The replication kinetics of the IDV-infected hAEC cultures were similar compared to the  
147 previous experiment at 33°C (**Figure 1A**). This shows that the replication kinetics for IDV in  
148 hAEC cultures is robust and independent from the donor. However, more importantly, we  
149 showed that the replication kinetics of IDV are almost identical to that of ICV.

150 In addition to the replication kinetics, we wanted to determine the respective cell  
151 tropism for ICV and IDV, as both viruses utilize 9-*O*-acetyl-*N*-acetylneuraminic acids as  
152 receptor determinant (1, 15). We therefore formalin-fixed the infected hAEC cultures to  
153 determine the cell tropism for both viruses via immunostaining. To discriminate between the  
154 ciliated and non-ciliated cell types, we used well-defined antibodies to visualize the cilia ( $\beta$ -  
155 tubulin IV), tight junction borders (Zonula occludens-1, ZO-1) and the nucleus (DAPI). We  
156 used our IDV-NP-antibody for detection of IDV infected cells, whereas for ICV we used the  
157 commercially available pooled human intravenous immunoglobulins (IVIg). We used the  
158 IVIg since most people have encountered one or multiple ICV infections during their life (28,  
159 29). By overlaying the different cellular marker stains with that of the virus antigen, we  
160 observed that for both ICV and IDV the virus-antigen signal overlaps with that of the ciliated  
161 cell marker (**Figure 2C and 2D**).

162 To accurately define the cell tropism, we counted all cell types among ten random  
163 fields per donor, with the criteria of at least having one virus-positive cell. For the IDV-  
164 infected hAEC cultures, we counted a total of 2273 cells from which 94 were NP-positive,  
165 while for ICV a total of 2526 cells and 84 ICV antigen-positive cells was observed. The  
166 majority of antigen-positive cells for both IDV and ICV overlapped with the ciliated cell  
167 marker with an overall percentage of 97.3 and 95.5, respectively (**Figure 2E**). This is in line



168 with our initial observation and shows that both IDV and ICV have a predominant preference  
169 for ciliated cells. In addition to the cellular tropism, we also calculated the overall infection  
170 rate for IDV and ICV, which is 4.1 and 3.3 percent, respectively (**Supplementary table 1**).  
171 These infection rates are in accordance with the previous observed replication kinetics  
172 (**Figure 2A and B**).

173 Collectively, our results demonstrate that IDV and ICV have similar kinetics in hAEC  
174 cultures and share a cell tropism preference towards ciliated cells. Most importantly, these  
175 results show that there is no intrinsic impairment of IDV propagation within the human  
176 respiratory epithelium.

177 **Discussion**

178           In this study, we demonstrate that IDV replicates efficiently in an *in vitro* surrogate  
179 model of the *in vivo* respiratory epithelium at ambient temperatures that correspond to the  
180 human upper and lower respiratory tract. We also demonstrate that IDV viral progeny is  
181 replication competent as it could be efficiently sequentially propagated onto hAEC cultures  
182 from different donors at both 33°C and 37°C. Intriguingly, the replication characteristics of  
183 the ruminant-associated IDV revealed many similarities to the human-associated ICV,  
184 including the cellular tropism for ciliated cells. These results show that there is no intrinsic  
185 impairment of IDV propagation within the human respiratory epithelium.

186           For successful inter-species transmission, a virus needs to overcome several barriers  
187 before it can efficiently replicate in the new host species (30). These barriers can be classified  
188 into three major groups; (i) viral entry through availability of the cellular receptor and  
189 proteases, (ii) viral replication and subversion of the host innate immune system followed by  
190 (iii) viral egress and release of infectious progeny virus. Our results clearly demonstrate that  
191 IDV fulfils most of these criteria for humans, as there is no fundamental restriction for viral  
192 replication and sequential propagation of IDV within hAEC cultures from different donors.  
193 However, we cannot assess whether IDV can be transmitted between humans with our model.  
194 Nonetheless, it has been demonstrated that IDV can be transmitted between both guinea pigs  
195 and ferrets, of which the latter is a surrogate model for assessing the transmission potential of  
196 emerging Influenza A viruses among humans (31–35). This knowledge in combination with  
197 the detection of IDV in aerosols collected at an international airport, and the limited  
198 epidemiological data of IDV prevalence among humans, warrants the need for increased  
199 surveillance of IDV among humans (18, 19).

200           At least two distinct genetic lineages are described for IDV, which have over 96%  
201 homology, from which the HEF glycoprotein (96.7 to 99.0% homology) is the most divergent  
202 of all 7 segments (2, 10). Because cattle are proposed as the main reservoir, we first selected

203 to use only the prototypic D/Bovine/Oklahoma/660/2013 strain, and therefore at that time did  
204 not include the prototypic D/Swine/Oklahoma/1334/2011 strain as a representative of the  
205 other lineage. However, due to strict national import regulations for animal pathogens, we  
206 currently cannot assess whether both circulating lineages of IDV exhibit similar  
207 characteristics in human respiratory epithelium. Although, it is worth mentioning that IDV  
208 has been detected in a nasopharyngeal wash of a field worker with close contact to swine (17).  
209 Suggesting that both lineages might exhibit similar characteristics in the human airway  
210 epithelium.

211 Both IDV and ICV utilize the 9-*O*-acetyl-*N*-acetylneuraminic acid as their receptor  
212 determinant for host cell entry (15, 27). We have shown that both viruses have a predominant  
213 affinity towards ciliated cells, suggesting that the distribution of this type of sialic acid is  
214 limited to ciliated cells within our *in vitro* model. This tropism is similar to what we  
215 previously observed for the human Coronavirus OC43, from which it has been reported to  
216 also utilize the 9-*O*-acetyl-*N*-acetylneuraminic acid as receptor determinant (36, 37).  
217 Nonetheless, whether this cell tropism for both IDV and ICV corresponds to that of the *in vivo*  
218 airway epithelium remains to be determined. Although, we previously have demonstrated that  
219 the hAEC cultures recapitulates many characteristics of the *in vivo* airway epithelium,  
220 including receptor distribution (36, 38).

221 In summary, we demonstrate that IDV replicates efficiently in an *in vitro* surrogate  
222 model of the *in vivo* respiratory epithelium. This shows that there is no intrinsic impairment of  
223 IDV propagation within the human respiratory epithelium and might explain why IDV-  
224 directed antibodies are detected among humans with occupational exposure to livestock.

225

## 226 **Material and methods**

### 227 **Cell culture**

228 The Madin-Darby Bovine Kidney (MDBK) cells were maintained in Eagle`s Minimum  
229 Essential Medium (EMEM; (Seroglob) supplemented with 7% heat-inactivated fetal bovine  
230 serum (FBS, Seraglob), 2 mmol/L Glutamax (Gibco), 100 µg/mL Streptomycin and 100  
231 IU/mL Penicillin (Gibco). Whereas the MDCK-I cells were maintained in EMEM,  
232 supplemented with 5% heat-inactivated FBS, 100 µg/mL Streptomycin and 100 IU/mL  
233 Penicillin (Gibco). Both cell lines were propagated at 37°C in a humidified incubator with 5%  
234 CO<sub>2</sub>.

235

### 236 **Viruses**

237 Influenza D virus (D/Bovine/Oklahoma/660/2013) was inoculated on MDBK cells and  
238 propagated in infection medium (EMEM, supplemented with 0.5% Bovine Serum Albumin  
239 (Sigma-Aldrich), 15 mmol/L of HEPES (Gibco), 100 µg/mL Streptomycin and 100 IU/mL  
240 Penicillin (Gibco), and 1 µg/mL Bovine pancreas-isolated acetylated trypsin (Sigma-  
241 Aldrich)). Infected MDBK cultures were maintained for 96 hours at 37°C. The ICV strain  
242 C/Johannesburg/1/66 was inoculated on MDCK-I cells and propagated in infection medium  
243 for 96 hours at 33°C. Virus containing supernatant was cleared from cell debris through  
244 centrifugation for 5 minutes at 500x *rcf* before aliquoting and storage at -80°C.

245

### 246 **Human airway epithelial cell culture**

247 Primary human bronchial cells were isolated from patients (>18 years old) undergoing  
248 bronchoscopy or pulmonary resection at the Cantonal Hospital in St. Gallen, Switzerland, in  
249 accordance with our ethical approval (EKSG 11/044, EKSG 11/103 and KEK-BE 302/2015).  
250 Isolation and culturing of primary human bronchial epithelial cells was performed as

251 previously described (39), with the minor modification of supplementing the BEGM with 10  
252  $\mu\text{mol/L}$  Rho associated protein kinase inhibitor (Y-27632, Abcam).

253

#### 254 **Viral replication in hAEC cultures**

255 The hAEC cultures were inoculated with 10.000 TCID<sub>50</sub>, or 32 hemagglutination units, of  
256 either IDV or ICV. The viruses were incubated for 1.5 hours at temperatures indicated in a  
257 humidified incubator with 5% CO<sub>2</sub>. Afterwards, inoculum was removed and the apical surface  
258 was washed thrice with Hanks Balanced Salt Solution (HBSS, Gibco), after which the cells  
259 were incubated at the indicated temperatures in a humidified incubator with 5% CO<sub>2</sub>. The  
260 infection was monitored as previously described, during which progeny virus was collected  
261 by incubating the apical surface with 100  $\mu\text{L}$  HBSS 10 minutes prior to the time point.  
262 Collected apical washes were stored 1:1 in virus transport medium for later quantification  
263 (39).

264

#### 265 **Virus titration by tissue culture infectious dosis 50 (TCID50)**

266 MDBK cells were seeded at a concentration of 40.000 cells per well in a 96-cluster well  
267 plates. The following day, medium was removed and cells were washed once with PBS and  
268 replaced with 50  $\mu\text{L}$  of infection medium. Virus containing samples were ten-fold serial  
269 diluted in infection medium, from which 50  $\mu\text{L}$  was added to the MDBK cells in six technical  
270 replicates per sample. The inoculated cells were incubated for 72 hours at 37°C in a  
271 humidified incubator with 5% CO<sub>2</sub>, where after they were fixed by crystal violet to determine  
272 the titre according to the protocol of Spearman-Kärber (40).

273

274

## 275 **Quantitative real-time reverse transcription PCR**

276 For quantification of the viral kinetics of IDV and ICV, viral RNA was extracted from 50  $\mu$ L  
277 apical wash using the NucleoMag VET (Macherey-Nagel), according to manufacturer  
278 guidelines, on a Kingfisher Flex Purification system (Thermofisher). Two microliters of  
279 extracted RNA was amplified using TaqMan™ Fast Virus 1-Step Master Mix (Thermofisher)  
280 according to the manufacturer's protocol using the forward primer 5`-  
281 AACCTGCTTCTGCTTGCAATCT-3`, reverse 5`-AACAATGAACAGTTACCGCATCA-3`  
282 and probe 5`-FAM-AGACCTGTCTAAACTATTT-BHQ1-3` targeting the P42-segment of  
283 ICV (AM410042.1). Whereas for the P42-segment of IDV (KF425664.1) the forward 5`-  
284 ATGCTGAAACTGTGGAAGAATTTTG-3`, reverse 5`-  
285 GGTCTTCCATTTATGATTGTCAACAA-3` and probe 5`-FAM-  
286 AAGGTTTATGTCCATTGTTTCA-BHQ1-3` were used. A standard curve of the P42-  
287 segment of Influenza C or D virus, cloned in pHW2000 plasmid, was included to interpolate  
288 the amount of genomic equivalents (41). Measurements and analysis were performed using an  
289 ABI7500 instrument and software package (ABI).

290

## 291 **Immunofluorescence of hAEC cultures**

292 The hAEC cultures were formalin-fixed and stained for immunofluorescence as previously  
293 described (39). For the detection of IDV-positive cells, hAEC cultures were stained with a  
294 custom generated rabbit polyclonal antibody directed against the nucleoprotein (NP) of the  
295 prototypic D/Bovine/Oklahoma/660/2013 strain (Genscript). Alexa Fluor® 647-labeled  
296 donkey anti-Rabbit IgG (H+L) (Jackson ImmunoResearch) was applied as secondary antibody.  
297 For the characterization and quantification of the cell tropism, hAEC cultures were stained  
298 with the custom generated polyclonal rabbit anti-NP (Genscript), mouse Anti- $\beta$ -tubulin IV  
299 (AB11315, Abcam) and goat anti-ZO1 (AB99642, Abcam). As secondary antibodies were the

300 following antibodies used; Alexa Fluor® 488-labeled donkey anti-mouse IgG (H+L), Cy3-  
301 labeled donkey anti-goat IgG (H+L) and Alexa Fluor® 647-labeled donkey anti-Rabbit IgG  
302 (H+L) (Jackson ImmunoResearch). In the case of ICV, hAEC cultures were stained with  
303 human IVIg (Sanquin, the Netherlands), mouse Anti- $\beta$ -tubulin IV (AB11315, Abcam), rabbit  
304 anti-ZO1 (617300, Thermofisher). Using Alexa Fluor® 488-labeled donkey anti-mouse IgG  
305 (H+L), Alexa Fluor® 594-labeled donkey anti-human IgG (H+L) and Alexa Fluor® 647-  
306 labeled donkey anti-Rabbit IgG (H+L) (Jackson ImmunoResearch) as secondary antibodies.  
307 All samples were counterstained using 4',6-diamidino-2-phenylindole (DAPI, Thermofischer)  
308 to visualize the nuclei. The immunostained inserts were mounted on Colorforst Plus  
309 microscopy slides (Thermofischer) in Prolong diamond antifade mountant (Thermo Fischer)  
310 and overlaid with 0.17 mm high precision coverslips (Marienfeld). The Z-stack images were  
311 acquired on a DeltaVision Elite High-Resolution imaging system (GE Healthcare Life  
312 Sciences) using a step size of 0.2  $\mu$ m with a 60x/1.42 oil objective. Images were deconvolved  
313 and cropped using the integrated softWoRx software package and processed using Fiji  
314 (ImageJ) and Imaris version 9.1.3 (Bitplane AG, Zurich, Switzerland) software packages.

315

### 316 **Data presentation**

317 Data was plotted using GraphPad Prism 7 and figures were assembled in Adobe Illustrator  
318 CS6.

319

### 320 **Acknowledgements**

321 We like to thank Feng Li from the South Dakota University, United States, for providing the  
322 IDV (D/Bovine/Oklahoma/660/2013) and Georg Herrler, University of Veterinary Medicine  
323 Hannover, Germany for providing ICV (C/Johannesburg/1/66). This study was supported by  
324 the Swiss National Science Foundation (project 179260).

325 **References**

326

- 327 1. Hause BM, Ducatez M, Collin EA, Ran Z, Liu R, Sheng Z, Arminen A, Kaplan B,  
328 Chakravarty S, Hoppe AD, Webby RJ, Simonson RR, Li F. 2013. Isolation of a Novel  
329 Swine Influenza Virus from Oklahoma in 2011 Which Is Distantly Related to Human  
330 Influenza C Viruses. *PLoS Pathog* 9.
- 331 2. Hause B, Collin E, Liu R, Huang B, Sheng Z, Lu W. 2014. Characterization of a novel  
332 influenza virus strain in cattle and swine: proposal for a new genus in the  
333 Orthomyxoviridae family. *MBio* 5:1–10.
- 334 3. Foni E, Chiapponi C, Baioni L, Zanni I, Merenda M, Rosignoli C, Kyriakis CS, Luini  
335 MV, Mandola ML, Nigrelli AD, Faccini S. 2017. Influenza D in Italy: towards a  
336 better understanding of an emerging viral infection in swine. *Sci Rep* 1–7.
- 337 4. Zhai S, Zhang H, Chen S, Zhou X, Lin T, Liu R, Lv D, Wen X, Wei W, Wang D, Li F.  
338 2017. Influenza D Virus in Animal Species in Guangdong province, Southern China  
339 23.
- 340 5. Horimoto T, Hiono T, Mekata H, Odagiri T, Lei Z, Kobayashi T, Norimine J, Inoshima  
341 Y, Hikono H, Murakami K, Sato R, Murakami H, Sakaguchi M, Ishii K, Ando T,  
342 Otomaru K, Ozawa M, Sakoda Y, Murakami S. 2016. Nationwide distribution of  
343 bovine influenza D virus infection in Japan. *PLoS One* 11:1–7.
- 344 6. Luo J, Ferguson L, Smith DR, Woolums AR, Epperson WB, Wan XF. 2017.  
345 Serological evidence for high prevalence of Influenza D Viruses in Cattle, Nebraska,  
346 United States, 2003–2004. *Virology* 501:88–91.
- 347 7. Ducatez MF, Pelletier C, Meyer G. 2015. Influenza d virus in cattle, France, 2011–  
348 2014. *Emerg Infect Dis* 21:368–371.
- 349 8. Flynn O, Gallagher C, Mooney J, Irvine C, Ducatez M, Hause B, Mcgrath G, Ryan E.  
350 2018. Influenza D Virus in Cattle, Ireland. *Emerg Infect Dis* 24:2016–2018.
- 351 9. Salem E, Cook EAJ, Lbacha HA, Oliva J, Awoume F, Aplogan GL, Hymann EC,  
352 Muloi D, Deem SL, Alali S, Zouagui Z, Fèvre EM, Meyer G, Ducatez MF. 2017.  
353 Serologic Evidence for Influenza C and D Virus among Ruminants and Camelids,  
354 Africa, 1991-2015. *Emerg Infect Dis* 23:2015–2018.
- 355 10. Collin EA, Sheng Z, Lang Y, Ma W, Hause BM, Li F. 2015. Cocirculation of Two  
356 Distinct Genetic and Antigenic Lineages of Proposed Influenza D Virus in Cattle. *J*  
357 *Virol* 89:1036–1042.
- 358 11. Ferguson L, Olivier AK, Genova S, Epperson WB, Smith DR, Schneider L, Barton K,  
359 McCuan K, Webby RJ, Wan X-F. 2016. Pathogenesis of Influenza D virus in Cattle. *J*  
360 *Virol* 90:JVI.03122-15.
- 361 12. Ferguson L, Luo K, Olivier AK, Cunningham FL, Blackmon S, Hanson-dorr K, Sun H,  
362 Baroch J, Lutman MW, Quade B, Epperson W, Webby R, Deliberto TJ, Wan X. 2018.  
363 Influenza D Virus Infection in Feral Swine Populations , United States. *Emerg Infect*  
364 *Dis* 24.
- 365 13. Nedland H, Wollman J, Sreenivasan C, Quast M, Singrey A, Fawcett L, Christopher-  
366 Hennings J, Nelson E, Kaushik RS, Wang D, Li F. 2017. Serological evidence for the  
367 co-circulation of two lineages of influenza D viruses in equine populations of the  
368 Midwest United States. *Zoonoses Public Health* 1–7.
- 369 14. White SK, Ma W, McDaniel CJ, Gray GC, Lednicky JA. 2016. Serologic evidence of  
370 exposure to influenza D virus among persons with occupational contact with cattle. *J*  
371 *Clin Virol* 81:31–33.
- 372 15. Rogers GN, Herrler G, Paulson JC, Klenk HD. 1986. Influenza C virus uses 9-O-  
373 acetyl-N-acetylneuraminic acid as a high affinity receptor determinant for attachment  
374 to cells. *J Biol Chem* 261:5947–5951.
- 375 16. Zhang H, Porter E, Lohman M, Lu N, Peddireddi L, Hanzlicek G, Marthaler D, Liu X,



- 376 Bai J. 2018. Influenza C virus in cattle with respiratory disease, United States, 2016–  
377 2018. *Emerg Infect Dis* 24:1926–1929.
- 378 17. Borkenhagen LK, Mallinson KA, Tsao RW, Ha SJ, Lim WH, Toh TH, Anderson BD,  
379 Fieldhouse JK, Philo SE, Chong K Sen, Lindsley WG, Ramirez A, Lowe JF, Coleman  
380 KK, Gray GC. 2018. Surveillance for respiratory and diarrheal pathogens at the human-  
381 pig interface in Sarawak, Malaysia. *PLoS One* 13:1–14.
- 382 18. Smith DB, Gaunt ER, Digard P, Templeton K, Simmonds P. 2016. Detection of  
383 influenza C virus but not influenza D virus in Scottish respiratory samples. *J Clin*  
384 *Virol*.
- 385 19. Bailey ES, Choi JY, Zemke J, Yondon M, Gray GC. 2018. Molecular surveillance of  
386 respiratory viruses with bioaerosol sampling in an airport. *Trop Dis Travel Med*  
387 *Vaccines* 4:11.
- 388 20. Sims AC, Baric RS, Yount B, Burkett SE, Collins PL, Pickles RJ. 2005. Severe acute  
389 respiratory syndrome coronavirus infection of human ciliated airway epithelia: role of  
390 ciliated cells in viral spread in the conducting airways of the lungs. *J Virol* 79:15511–  
391 15524.
- 392 21. Kindler E, Jónsdóttir HR, Muth D, Hamming OJ, Hartmann R, Rodriguez R, Geffers  
393 R, Fouchier RAM, Drosten C, Müller MA, Dijkman R, Thiel V. 2013. Efficient  
394 replication of the novel human betacoronavirus EMC on primary human epithelium  
395 highlights its zoonotic potential. *MBio* 4.
- 396 22. Menachery VD, Yount BL, Sims AC, Debbink K, Agnihothram SS, Gralinski LE,  
397 Graham RL, Scobey T, Plante JA, Royall SR, Swanstrom J, Sheahan TP, Pickles RJ,  
398 Corti D, Randell SH, Lanzavecchia A, Marasco WA, Baric RS. 2016. SARS-like  
399 WIV1-CoV poised for human emergence. *Proc Natl Acad Sci*.
- 400 23. Huang DTN, Lu CY, Chi YH, Li WL, Chang LY, Lai MJ, Chen JS, Hsu WM, Huang  
401 LM. 2017. Adaptation of influenza A (H7N9) virus in primary human airway epithelial  
402 cells. *Sci Rep* 7:1–10.
- 403 24. Zhou J, Li C, Sachs N, Chiu MC, Wong BH-Y, Chu H, Poon VK-M, Wang D, Zhao X,  
404 Wen L, Song W, Yuan S, Wong KK-Y, Chan JF-W, To KK-W, Chen H, Clevers H,  
405 Yuen K-Y. 2018. Differentiated human airway organoids to assess infectivity of  
406 emerging influenza virus. *Proc Natl Acad Sci*.
- 407 25. Wang P, Palese P, O’Neill RE. 1997. The NPI-1/NPI-3 Nucleoprotein, (karyopherin  $\alpha$ )  
408 binding site on the influenza A virus NP is a nonconventional nuclear localization  
409 signal. *J Virol* 71:1850– 1856.
- 410 26. Ozawa M, Fujii K, Muramoto Y, Yamada S, Yamayoshi S, Takada A, Goto H,  
411 Horimoto T, Kawaoka Y. 2007. Contributions of two nuclear localization signals of  
412 influenza A virus nucleoprotein to viral replication. *J Virol*.
- 413 27. Song H, Qi J, Khedri Z, Diaz S, Yu H, Chen X, Varki A, Shi Y, Gao GF. 2016. An  
414 Open Receptor-Binding Cavity of Hemagglutinin-Esterase-Fusion Glycoprotein from  
415 Newly-Identified Influenza D Virus: Basis for Its Broad Cell Tropism. *PLoS Pathog*  
416 12.
- 417 28. Matsuzaki Y, Katsushima N, Nagai Y, Shoji M, Sakamoto M, Kitaoka S, Mizuta K,  
418 Nishimura H, The S, Diseases I, May N, Matsuzaki Y, Katsushima N, Nagai Y, Shoji  
419 M, Itagaki T, Sakamoto M. 2006. Clinical Features of Influenza C Virus Infection in  
420 Children. *J Infect Dis* 193:1229–1235.
- 421 29. Salez N, Mélade J, Pascalis H, Aherfi S, Dellagi K, Charrel RN, Carrat F, de  
422 Lamballerie X. 2014. Influenza C virus high seroprevalence rates observed in 3  
423 different population groups. *J Infect* 69:182–189.
- 424 30. Kuiken T, Holmes EC, McCauley J, Rimmelzwaan GF, Williams CS, Grenfell BT.  
425 2006. Host Species Barriers to Influenza Virus Infections. *Science* (80- ) 312:394–397.
- 426 31. Herfst S, Schrauwen EJA, Linster M, Chutinimitkul S, De E, Munster VJ, Sorrell EM,

- 427 Bestebroer TM, Burke DF, Derek J, Rimmelzwaan GF, Osterhaus ADME, Fouchier  
428 RAM. 2012. Airborne Transmission of Influenza A/H5N1 Virus Between Ferrets.  
429 Science (80- ) 336:1534–1541.
- 430 32. Imai M, Watanabe T, Hatta M, Das SC, Ozawa M, Shinya K, Zhong G, Hanson A,  
431 Katsura H, Watanabe S, Li C, Kawakami E, Yamada S, Kiso M, Suzuki Y, Maher EA,  
432 Neumann G, Kawaoka Y. 2012. Experimental adaptation of an influenza H5 HA  
433 confers respiratory droplet transmission to a reassortant H5 HA/H1N1 virus in ferrets.  
434 Nature 486:420–428.
- 435 33. Sreenivasan C, Thomas M, Sheng Z, Hause BM, Collin EA, Knudsen DEB, Pillatzki  
436 A, Nelson E, Wang D, Kaushik RS, Li F. 2015. Replication and Transmission of the  
437 Novel Bovine Influenza D Virus in a Guinea Pig Model. J Virol 89:11990–2001.
- 438 34. Maines TR, Jayaraman A, Belser JA, Wadford DA, Pappas C, Zeng H, Gustin KM,  
439 Pearce MB, Viswanathan K, Shriver ZH, Raman R, Cox NJ, Sasisekharan R, Katz JM,  
440 Tumpey TM. 2009. Transmission and pathogenesis of swine-origin 2009 A(H1N1)  
441 influenza viruses in ferrets and mice. Science (80- ).
- 442 35. Munster VJ, De Wit E, Van Den Brand JMA, Herfst S, Schrauwen EJA, Bestebroer  
443 TM, Van Vijver D De, Boucher CA, Koopmans M, Rimmelzwaan GF, Kuiken T,  
444 Osterhaus ADME, Fouchier RAM. 2009. Pathogenesis and transmission of swine-  
445 origin 2009 A(H1N1) influenza virus in ferrets. Science (80- ).
- 446 36. Dijkman R, Jebbink MF, Koekkoek SM, Deijns M, Jónsdóttir HR, Molenkamp R, Ieven  
447 M, Goossens H, Thiel V, van der Hoek L. 2013. Isolation and characterization of  
448 current human coronavirus strains in primary human epithelial cell cultures reveal  
449 differences in target cell tropism. J Virol 87:6081–90.
- 450 37. Vlasak R, Luytjes W, Spaan W, Palese P. 1988. Human and bovine coronaviruses  
451 recognize sialic acid-containing receptors similar to those of influenza C viruses. Proc  
452 Natl Acad Sci U S A.
- 453 38. Raj VS, Mou H, Smits SL, Dekkers DHW, Müller M a, Dijkman R, Muth D, Demmers  
454 J a a, Zaki A, Fouchier R a M, Thiel V, Drosten C, Rottier PJM, Osterhaus ADME,  
455 Bosch BJ, Haagmans BL. 2013. Dipeptidyl peptidase 4 is a functional receptor for the  
456 emerging human coronavirus-EMC. Nature 495:251–4.
- 457 39. Jonsdottir HR, Dijkman R. 2015. Characterization of Human Coronaviruses on Well-  
458 Differentiated Human Airway Epithelial Cell Cultures, p. 73–87. In Maier, HJ,  
459 Bickerton, E, Britton, P (eds.), Coronaviruses: Methods and Protocols. Springer New  
460 York, New York, NY.
- 461 40. Hierholzer JC, Killington RA. 1996. 2 - Virus isolation and quantitation, p. 25–46. In  
462 Mahy, BWJ, Kangro, HO (eds.), Virology Methods Manual. Academic Press, London.
- 463 41. Hoffmann E, Neumann G, Kawaoka Y, Hobom G, Webster RG. 2000. A DNA  
464 transfection system for generation of influenza A virus from eight plasmids. Proc Natl  
465 Acad Sci 97:6108–6113.
- 466
- 467

468 **Figure 1: Efficient replication of Influenza D virus (IDV) in hAEC cultures.**

469 Human airway epithelial cell cultures were inoculated with 10.000 TCID<sub>50</sub> of IDV and  
470 incubated at either 33°C or 37°C. The monitored viral RNA yield is given as genomic  
471 equivalents (GE) per 2 µL of isolated RNA (y-axis) at indicated hours post-inoculation (x-  
472 axis) for 33°C (**A**) and 37°C (**B**). Whereas the viral titer is given as TCID<sub>50</sub>/mL (y-axis) for  
473 33°C (**C**) and 37°C (**D**) at indicated hours post-inoculation (x-axis). These results are  
474 displayed as means and SD from duplicates from three independent donors. Human airway  
475 epithelial cell cultures were formalin-fixed and immunostained with a custom generated  
476 antibody against the Nucleoprotein (NP) of Influenza D virus to detect viral antigen. A  
477 representative image from one of the three independent donors is shown for IDV infection at  
478 33°C and 37°C (**E&G**) as well as their respective controls (**F&H**). Magnification 60x, the  
479 scale bar represents 10 micrometer. To assess if IDV viral progeny is infectious, hAEC  
480 cultures were inoculated with tenfold-diluted apical wash and sequentially propagated upon  
481 new hAEC cultures. The monitored viral RNA yield is given as genomic equivalents (GE) per  
482 2 µL of isolated RNA (y-axis) at indicated hours post-inoculation (x-axis) for each of the  
483 conditions (**I**). Whereas the viral titer is given as TCID<sub>50</sub>/mL (y-axis) for each condition, at  
484 indicated hours post-inoculation (x-axis) (**J**). The results are displayed as means and SD from  
485 duplicates from three independent donors.

486 **Figure 2: Comparison of ICV and IDV infection in hAEC cultures**

487 Human airway epithelial cell cultures were inoculated with 32 Hemagglutination assay units  
488 of ICV or IDV and incubated at 33°C. The monitored viral RNA yield is given as genomic  
489 equivalents (GE) per 2 µL of isolated RNA (y-axis) at indicated hours post-inoculation (x-  
490 axis) for ICV (A) and IDV (B). The results are displayed as means and SD from duplicates  
491 from three independent donors. Formalin-fixed ICV and IDV infected hAEC cultures and  
492 their respective controls were immunostained with antibodies to visualize the cilia (β-tubulin  
493 IV, green), tight junction borders (ZO-1, purple). Whereas virus-infected cells (red) were  
494 visualized with either a custom generated IDV NP-antibody or intravenous immunoglobulins  
495 (IVIg) for ICV (C&D). Magnification 60x, the scale bar represents 10 micrometer. The cell  
496 tropism of ICV (Black bars) and IDV (white bars) was quantified by calculating the  
497 percentage of viral antigen-positive signal co-localization with either ciliated or non-ciliated  
498 cells (E). The mean percentage and SEM from ten random fields from three independent  
499 donors are displayed.

500

501 **Biographical sketch first author.**

502 Melle Holwerda is a PhD-student at the Department of Infectious diseases and Pathobiology,

503 Vetsuisse faculty at the University of Bern. His focus lays in the characterization of emerging

504 viruses and developing tools to study how these pathogens interact with the host.

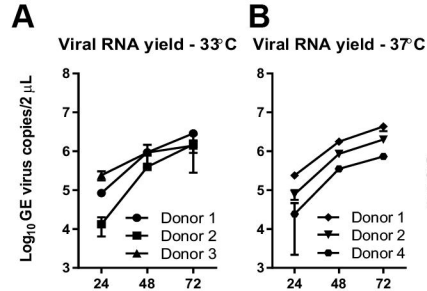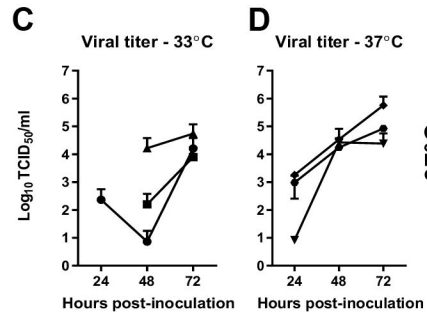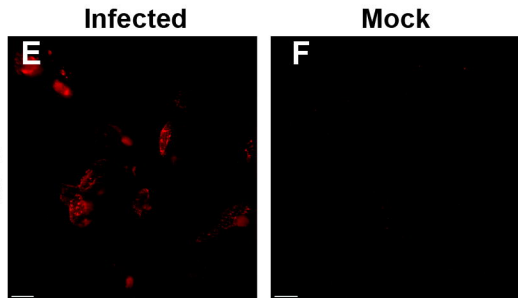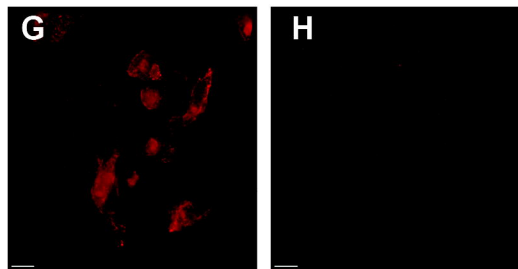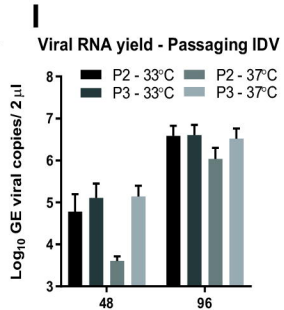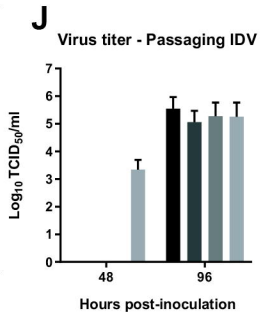

**A**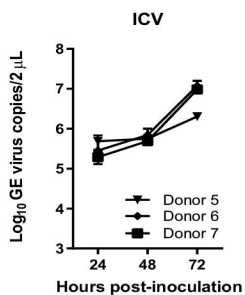**B**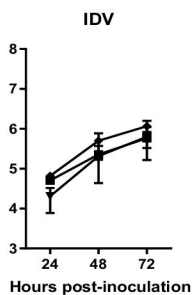**E**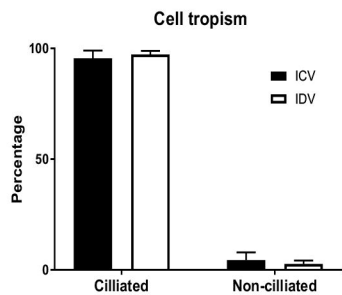**C** **$\beta$ -Tubulin IV****IVIg****ZO-1****Overlay****Infected**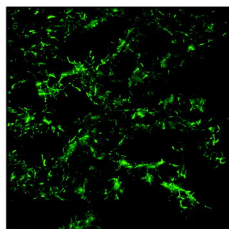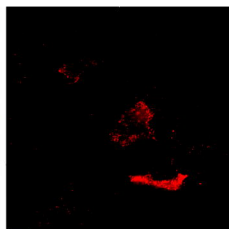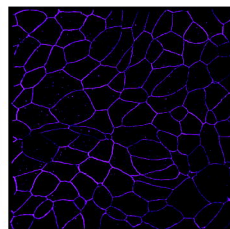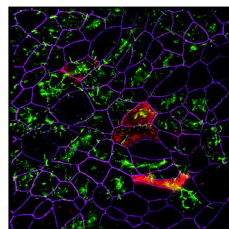**Mock**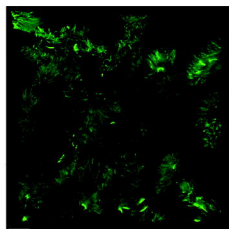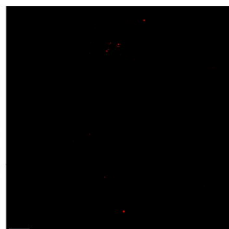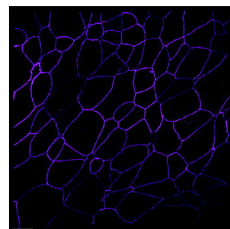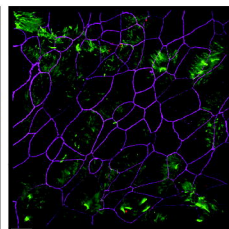**D** **$\beta$ -Tubulin IV****IDV-NP****ZO-1****Overlay****Infected**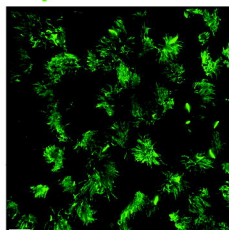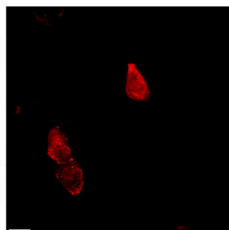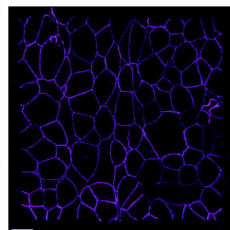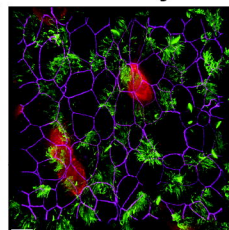**Mock**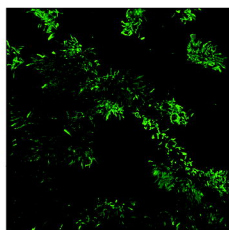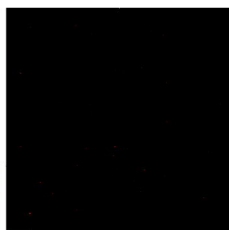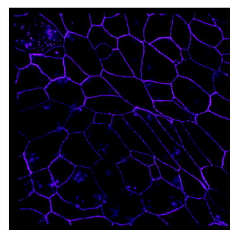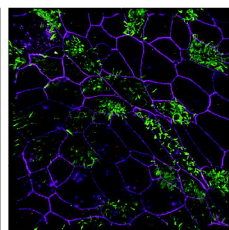

Source: https://www.biorxiv.org/content/10.1101/395517v2.full.pdf
